# Supplementary material for: Clinical guidelines of UTIs in children: quality appraisal with AGREE II and recommendations analysis
Source: HighWire-hosted journal article supplement (doi:10.1136/bmjopen-2021-057736), 2022-04-01
Supplement: bmjopen-2021-057736supp001_data_supplement.pdf [file bmjopen-2021-057736supp001_data_supplement.pdf]

**Database: PubMed**

Year limit: from database-inception time to June 2020

Search Strategy:

- #1 "Urinary Tract Infection"[Mesh]
- #2 Urinary Tract Infection[Title/Abstract]
- #3 Infection, Urinary Tract[Title/Abstract]
- #4 Infections, Urinary Tract[Title/Abstract]
- #5 Tract Infection, Urinary[Title/Abstract]
- #6 Tract Infections, Urinary[Title/Abstract]
- #7 #1 OR #2 OR #3 OR #4 OR #5 OR #6
- #8 "Guideline" [Publication Type]
- #9 "Practice Guidelines as Topic"[Mesh]
- #10 Guidelines[title]
- #11 Guideline[title]
- #12 Guidance[title]
- #13 Recommendation[title]
- #14 consensus[title]
- #15 #8 OR #9 OR #10 OR #11 OR #12 OR #13 OR #14
- #16 "Child"[Mesh]
- #17 "Child, Preschool"[Mesh]
- #18 "Infant"[Mesh]
- #19 "Adolescent"[Mesh]
- #20 "Infant, Newborn"[Mesh]
- #21 (child[Title/Abstract] OR pediat[Title/Abstract] OR paediat[Title/Abstract] OR infan[Title/Abstract] OR youth[Title/Abstract] OR toddle[Title/Abstract] ORadolesc[Title/Abstract] OR teen[Title/Abstract] OR boy[Title/Abstract] OR girl[Title/Abstract] OR bab[Title/Abstract] OR preschool[Title/Abstract] OR pre-school[Title/Abstract])
- #22 #16 OR #17 OR #18 OR #19 OR #20 OR #21
- #23 #7 AND #15 AND #22

**Database: SinoMed**

Year limit: from database-inception time to June 2020

Search Strategy:

- #1 "泌尿道感染"[不加权:扩展]
- #2 "泌尿道感染"[常用字段:智能]
- #3 "泌尿系感染"[常用字段:智能]
- #4 "尿路感染"[常用字段:智能]
- #5 "尿道感染"[常用字段:智能]
- #6 #1 OR #2 OR #3 OR #4 OR #5
- #7 "指南"[不加权:扩展]
- #8 "指南"[常用字段:智能]
- #9 "指引"[常用字段:智能]

- #10 "共识"[常用字段:智能]
- #11 "规范"[常用字段:智能]
- #12 "草案"[常用字段:智能]
- #13 #7 OR #8 OR #9 OR #10 OR #11 OR #12
- #14 "儿童"[不加权:扩展]
- #15 "婴儿"[不加权:扩展]
- #16 "青少年"[不加权:扩展]
- #17 "未成年人"[不加权:扩展]
- #18 儿童 OR 婴儿 OR 小儿 OR 新生儿 OR 早产儿 OR 未成年 OR 学龄前 OR 幼儿 OR 青少年
- #19 少年 OR 患儿 OR 儿科 OR 少女 OR 少男 OR 少儿 OR 青春期 OR 病儿 OR 学生
- #20 #14 OR #15 OR #16 OR #17 OR #18 OR #19
- #21 #6 AND #13 AND #20

**Database: CHKD**

Year limit: from database-inception time to June 2020

Search Strategy:

- #1 "泌尿道感染"[主要主题]
- #2 "泌尿道感染"[题名/关键词/摘要]
- #3 "泌尿系感染"[题名/关键词/摘要]
- #4 "尿路感染"[题名/关键词/摘要]
- #5 "尿道感染"[题名/关键词/摘要]
- #6 #1 OR #2 OR #3 OR #4 OR #5
- #7 "指南"[主要主题]
- #8 "指南"[题名/关键词/摘要]
- #9 "指引"[题名/关键词/摘要]
- #10 "共识"[题名/关键词/摘要]
- #11 "规范"[题名/关键词/摘要]
- #12 "草案"[题名/关键词/摘要]
- #13 #6 AND (#7 OR #8 OR #9 OR #10 OR #11 OR #12)
- #14 "儿童"[主要主题]
- #15 "儿童"[题名/关键词/摘要]
- #16 "小儿"[题名/关键词/摘要]
- #17 "幼儿"[题名/关键词/摘要]
- #18 "婴幼儿"[题名/关键词/摘要]
- #19 "新生儿"[题名/关键词/摘要]
- #20 #13 AND (#14 OR #15 OR #16 OR #17 OR #18 OR #19)

**Database: Wangfang Data**

Year limit: from database-inception time to June 2020

Search Strategy:

- #1 "泌尿道感染"[主题] OR "泌尿道感染"[题名或关键词] OR "泌尿系感染"[题名或关键词] OR "尿路感染"[题名或关键词] OR "尿道感染"[题名或关键词]
- #2 "指南"[主题] OR "指南"[题名或关键词] OR "指引"[题名或关键词] OR "共识"[题名或关键词] OR "规范"[题名或关键词] OR "草案"[题名或关键词]
- #3 "儿童"[主题] OR "儿童"[题名或关键词] OR "小儿"[题名或关键词] OR "幼儿"[题名或关键词] OR "婴幼儿"[题名或关键词] OR "新生儿"[题名或关键词]
- #4 #1 AND #2 AND #3

**Database: VIP**

Year limit: from database-inception time to June 2020

Search Strategy:

- #1 "泌尿道感染"[题名或关键词] OR "泌尿系感染"[题名或关键词] OR "尿路感染"[题名或关键词] OR "尿道感染"[题名或关键词]
- #2 "指南"[题名或关键词] OR "指引"[题名或关键词] OR "共识"[题名或关键词] OR "规范"[题名或关键词] OR "草案"[题名或关键词]
- #3 "儿童"[题名或关键词] OR "小儿"[题名或关键词] OR "幼儿"[题名或关键词] OR "婴幼儿"[题名或关键词] OR "新生儿"[题名或关键词]
- #4 #1 AND #2 AND #3

**Website: NICE (<https://www.nice.org.uk/guidance/published?type=cg>)**

Search Data: 06-23-2020

Search Term: Urinary Tract Infection

**Website: GIN (<https://www.g-i-n.net>)**

Search Data: 06-23-2020

Search Term: Urinary Tract Infection

**Website: WHO (<http://apps.who.int/iris/?locale=zh>)**

Search Data: 06-23-2020

Search Terms: Urinary Tract Infection, Guideline, Child

**Website: Medlive (<http://guide.medlive.cn/>)**

Search Data: 06-23-2020

Search Terms: 泌尿系感染; 泌尿道感染; 尿路感染; 尿道感染; 肾盂肾炎; 膀胱炎
