# Supplementary material for: Clinical guidelines of UTIs in children: quality appraisal with AGREE II and recommendations analysis
Source: PubMed Central journal article supplement — BMJ Open. 2022 Apr 26;12(4):e057736. doi: 10.1136/bmjopen-2021-057736 (PMC9047976; doi:10.1136/bmjopen-2021-057736), 2022-04-26
Supplement: bmjopen-2021-057736supp002.pdf [file bmjopen-2021-057736supp002.pdf]

| AAP      | Assessor 1<br>Zhu BH | Assessor 2<br>Liang Y | Assessor 3<br>Mi L | Assessor 4<br>Duan F |        |
|----------|----------------------|-----------------------|--------------------|----------------------|--------|
| Domain 1 |                      |                       |                    | Domain scores        | 69.44% |
|          | Assessor 1           | Assessor 2            | Assessor 3         | Assessor 4           | Total  |
| Item 1   | 6                    | 4                     | 4                  | 4                    | 18     |
| Item 2   | 4                    | 4                     | 6                  | 4                    | 18     |
| Item 3   | 6                    | 7                     | 6                  | 7                    | 26     |
| Total    | 16                   | 15                    | 16                 | 15                   | 62     |
| Domain 2 |                      |                       |                    | Domain scores        | 26.39% |
|          | Assessor 1           | Assessor 2            | Assessor 3         | Assessor 4           | Total  |
| Item 4   | 4                    | 7                     | 5                  | 7                    | 23     |
| Item 5   | 1                    | 1                     | 1                  | 1                    | 4      |
| Item 6   | 1                    | 1                     | 1                  | 1                    | 4      |
| Total    | 6                    | 9                     | 7                  | 9                    | 31     |
| Domain 3 |                      |                       |                    | Domain scores        | 36.98% |
|          | Assessor 1           | Assessor 2            | Assessor 3         | Assessor 4           | Total  |
| Item 7   | 1                    | 2                     | 1                  | 2                    | 6      |
| Item 8   | 1                    | 1                     | 1                  | 1                    | 4      |
| Item 9   | 4                    | 6                     | 5                  | 6                    | 21     |
| Item 10  | 1                    | 1                     | 1                  | 1                    | 4      |
| Item 11  | 6                    | 6                     | 3                  | 6                    | 21     |
| Item 12  | 6                    | 7                     | 7                  | 7                    | 27     |
| Item 13  | 1                    | 1                     | 1                  | 1                    | 4      |
| Item 14  | 5                    | 4                     | 3                  | 4                    | 16     |
| Total    | 25                   | 28                    | 22                 | 28                   | 103    |
| Domain 4 |                      |                       |                    | Domain scores        | 87.50% |
|          | Assessor 1           | Assessor 2            | Assessor 3         | Assessor 4           | Total  |
| Item 15  | 7                    | 6                     | 6                  | 6                    | 25     |
| Item 16  | 5                    | 7                     | 6                  | 6                    | 24     |
| Item 17  | 7                    | 7                     | 6                  | 6                    | 26     |
| Total    | 19                   | 20                    | 18                 | 18                   | 75     |
| Domain 5 |                      |                       |                    | Domain scores        | 25.00% |
|          | Assessor 1           | Assessor 2            | Assessor 3         | Assessor 4           | Total  |
| Item 18  | 1                    | 1                     | 1                  | 1                    | 4      |
| Item 19  | 1                    | 1                     | 1                  | 1                    | 4      |
| Item 20  | 2                    | 3                     | 2                  | 3                    | 10     |
| Item 21  | 5                    | 6                     | 5                  | 6                    | 22     |
| Total    | 9                    | 11                    | 9                  | 11                   | 40     |
| Domain 6 |                      |                       |                    | Domain scores        | 97.92% |
|          | Assessor 1           | Assessor 2            | Assessor 3         | Assessor 4           | Total  |
| Item 22  | 7                    | 7                     | 6                  | 7                    | 27     |
| Item 23  | 7                    | 7                     | 6                  | 7                    | 27     |
| Total    | 14                   | 14                    | 12                 | 14                   | 54     |

| EAU/ESPU | Assessor 1<br>Zhu BH | Assessor 2<br>Liang Y | Assessor 3<br>Mi L | Assessor 4<br>Duan F |        |
|----------|----------------------|-----------------------|--------------------|----------------------|--------|
| Domain 1 |                      |                       |                    | Domain scores        | 75.00% |
|          | Assessor 1           | Assessor 2            | Assessor 3         | Assessor 4           | Total  |
| Item 1   | 6                    | 7                     | 7                  | 7                    | 27     |
| Item 2   | 5                    | 6                     | 6                  | 4                    | 21     |
| Item 3   | 3                    | 6                     | 4                  | 5                    | 18     |
| Total    | 14                   | 19                    | 17                 | 16                   | 66     |
| Domain 2 |                      |                       |                    | Domain scores        | 31.94% |
|          | Assessor 1           | Assessor 2            | Assessor 3         | Assessor 4           | Total  |
| Item 4   | 6                    | 7                     | 7                  | 7                    | 27     |
| Item 5   | 1                    | 1                     | 1                  | 1                    | 4      |
| Item 6   | 1                    | 1                     | 1                  | 1                    | 4      |
| Total    | 8                    | 9                     | 9                  | 9                    | 35     |
| Domain 3 |                      |                       |                    | Domain scores        | 45.83% |
|          | Assessor 1           | Assessor 2            | Assessor 3         | Assessor 4           | Total  |
| Item 7   | 5                    | 5                     | 6                  | 4                    | 20     |
| Item 8   | 2                    | 3                     | 3                  | 4                    | 12     |
| Item 9   | 2                    | 4                     | 1                  | 4                    | 11     |
| Item 10  | 5                    | 6                     | 6                  | 6                    | 23     |
| Item 11  | 6                    | 6                     | 5                  | 6                    | 23     |
| Item 12  | 5                    | 6                     | 6                  | 6                    | 23     |
| Item 13  | 1                    | 1                     | 1                  | 1                    | 4      |
| Item 14  | 1                    | 1                     | 1                  | 1                    | 4      |
| Total    | 27                   | 32                    | 29                 | 32                   | 120    |
| Domain 4 |                      |                       |                    | Domain scores        | 73.61% |
|          | Assessor 1           | Assessor 2            | Assessor 3         | Assessor 4           | Total  |
| Item 15  | 6                    | 5                     | 6                  | 5                    | 22     |
| Item 16  | 4                    | 6                     | 5                  | 6                    | 21     |
| Item 17  | 4                    | 6                     | 6                  | 6                    | 22     |
| Total    | 14                   | 17                    | 17                 | 17                   | 65     |
| Domain 5 |                      |                       |                    | Domain scores        | 33.33% |
|          | Assessor 1           | Assessor 2            | Assessor 3         | Assessor 4           | Total  |
| Item 18  | 1                    | 1                     | 1                  | 1                    | 4      |
| Item 19  | 5                    | 4                     | 3                  | 4                    | 16     |
| Item 20  | 1                    | 1                     | 1                  | 1                    | 4      |
| Item 21  | 6                    | 7                     | 4                  | 7                    | 24     |
| Total    | 13                   | 13                    | 9                  | 13                   | 48     |
| Domain 6 |                      |                       |                    | Domain scores        | 97.92% |
|          | Assessor 1           | Assessor 2            | Assessor 3         | Assessor 4           | Total  |
| Item 22  | 7                    | 7                     | 6                  | 7                    | 27     |
| Item 23  | 7                    | 7                     | 7                  | 7                    | 28     |
| Total    | 14                   | 14                    | 13                 | 14                   | 55     |

| SINePe   | Assessor 1<br>Zhu BH | Assessor 2<br>Liang Y | Assessor 3<br>Mi L | Assessor 4<br>Duan F |        |
|----------|----------------------|-----------------------|--------------------|----------------------|--------|
| Domain 1 |                      |                       |                    | Domain scores        | 88.89% |
|          | Assessor 1           | Assessor 2            | Assessor 3         | Assessor 4           | Total  |
| Item 1   | 6                    | 7                     | 6                  | 7                    | 26     |
| Item 2   | 4                    | 7                     | 6                  | 5                    | 22     |
| Item 3   | 7                    | 7                     | 7                  | 7                    | 28     |
| Total    | 17                   | 21                    | 19                 | 19                   | 76     |
| Domain 2 |                      |                       |                    | Domain scores        | 55.56% |
|          | Assessor 1           | Assessor 2            | Assessor 3         | Assessor 4           | Total  |
| Item 4   | 5                    | 7                     | 4                  | 6                    | 22     |
| Item 5   | 1                    | 1                     | 1                  | 1                    | 4      |
| Item 6   | 7                    | 6                     | 7                  | 6                    | 26     |
| Total    | 13                   | 14                    | 12                 | 13                   | 52     |
| Domain 3 |                      |                       |                    | Domain scores        | 48.96% |
|          | Assessor 1           | Assessor 2            | Assessor 3         | Assessor 4           | Total  |
| Item 7   | 1                    | 2                     | 2                  | 2                    | 7      |
| Item 8   | 4                    | 5                     | 6                  | 5                    | 20     |
| Item 9   | 5                    | 6                     | 5                  | 6                    | 22     |
| Item 10  | 4                    | 6                     | 4                  | 6                    | 20     |
| Item 11  | 5                    | 7                     | 6                  | 7                    | 25     |
| Item 12  | 5                    | 6                     | 5                  | 6                    | 22     |
| Item 13  | 1                    | 2                     | 1                  | 2                    | 6      |
| Item 14  | 1                    | 1                     | 1                  | 1                    | 4      |
| Total    | 26                   | 35                    | 30                 | 35                   | 126    |
| Domain 4 |                      |                       |                    | Domain scores        | 84.72% |
|          | Assessor 1           | Assessor 2            | Assessor 3         | Assessor 4           | Total  |
| Item 15  | 6                    | 6                     | 6                  | 6                    | 24     |
| Item 16  | 6                    | 6                     | 6                  | 6                    | 24     |
| Item 17  | 5                    | 7                     | 6                  | 7                    | 25     |
| Total    | 17                   | 19                    | 18                 | 19                   | 73     |
| Domain 5 |                      |                       |                    | Domain scores        | 61.46% |
|          | Assessor 1           | Assessor 2            | Assessor 3         | Assessor 4           | Total  |
| Item 18  | 4                    | 4                     | 4                  | 4                    | 16     |
| Item 19  | 5                    | 4                     | 5                  | 5                    | 19     |
| Item 20  | 3                    | 4                     | 3                  | 4                    | 14     |
| Item 21  | 6                    | 7                     | 6                  | 7                    | 26     |
| Total    | 18                   | 19                    | 18                 | 20                   | 75     |
| Domain 6 |                      |                       |                    | Domain scores        | 95.83% |
|          | Assessor 1           | Assessor 2            | Assessor 3         | Assessor 4           | Total  |
| Item 22  | 7                    | 7                     | 6                  | 7                    | 27     |
| Item 23  | 7                    | 7                     | 6                  | 7                    | 27     |
| Total    | 14                   | 14                    | 12                 | 14                   | 54     |

| KHA-CARI | Assessor 1<br>Zhu BH | Assessor 2<br>Liang Y | Assessor 3<br>Mi L | Assessor 4<br>Duan F |        |
|----------|----------------------|-----------------------|--------------------|----------------------|--------|
| Domain 1 |                      |                       |                    | Domain scores        | 54.17% |
|          | Assessor 1           | Assessor 2            | Assessor 3         | Assessor 4           | Total  |
| Item 1   | 3                    | 4                     | 5                  | 2                    | 14     |
| Item 2   | 3                    | 6                     | 5                  | 4                    | 18     |
| Item 3   | 3                    | 6                     | 4                  | 6                    | 19     |
| Total    | 9                    | 16                    | 14                 | 12                   | 51     |
| Domain 2 |                      |                       |                    | Domain scores        | 25.00% |
|          | Assessor 1           | Assessor 2            | Assessor 3         | Assessor 4           | Total  |
| Item 4   | 4                    | 6                     | 4                  | 6                    | 20     |
| Item 5   | 1                    | 1                     | 1                  | 1                    | 4      |
| Item 6   | 1                    | 1                     | 3                  | 1                    | 6      |
| Total    | 6                    | 8                     | 8                  | 8                    | 30     |
| Domain 3 |                      |                       |                    | Domain scores        | 34.90% |
|          | Assessor 1           | Assessor 2            | Assessor 3         | Assessor 4           | Total  |
| Item 7   | 1                    | 1                     | 1                  | 1                    | 4      |
| Item 8   | 1                    | 1                     | 1                  | 1                    | 4      |
| Item 9   | 5                    | 7                     | 6                  | 7                    | 25     |
| Item 10  | 6                    | 4                     | 4                  | 5                    | 19     |
| Item 11  | 5                    | 4                     | 5                  | 4                    | 18     |
| Item 12  | 4                    | 6                     | 5                  | 6                    | 21     |
| Item 13  | 1                    | 1                     | 1                  | 1                    | 4      |
| Item 14  | 1                    | 1                     | 1                  | 1                    | 4      |
| Total    | 24                   | 25                    | 24                 | 26                   | 99     |
| Domain 4 |                      |                       |                    | Domain scores        | 84.72% |
|          | Assessor 1           | Assessor 2            | Assessor 3         | Assessor 4           | Total  |
| Item 15  | 6                    | 6                     | 6                  | 6                    | 24     |
| Item 16  | 5                    | 6                     | 6                  | 6                    | 23     |
| Item 17  | 6                    | 7                     | 6                  | 7                    | 26     |
| Total    | 17                   | 19                    | 18                 | 19                   | 73     |
| Domain 5 |                      |                       |                    | Domain scores        | 34.38% |
|          | Assessor 1           | Assessor 2            | Assessor 3         | Assessor 4           | Total  |
| Item 18  | 1                    | 1                     | 1                  | 1                    | 4      |
| Item 19  | 6                    | 4                     | 5                  | 4                    | 19     |
| Item 20  | 1                    | 1                     | 1                  | 1                    | 4      |
| Item 21  | 5                    | 6                     | 5                  | 6                    | 22     |
| Total    | 13                   | 12                    | 12                 | 12                   | 49     |
| Domain 6 |                      |                       |                    | Domain scores        | 0.00%  |
|          | Assessor 1           | Assessor 2            | Assessor 3         | Assessor 4           | Total  |
| Item 22  | 1                    | 1                     | 1                  | 1                    | 4      |
| Item 23  | 1                    | 1                     | 1                  | 1                    | 4      |
| Total    | 2                    | 2                     | 2                  | 2                    | 8      |

| CPS      | Assessor 1<br>Zhu BH | Assessor 2<br>Liang Y | Assessor 3<br>Mi L | Assessor 4<br>Duan F |        |
|----------|----------------------|-----------------------|--------------------|----------------------|--------|
| Domain 1 |                      |                       |                    | Domain scores        | 73.61% |
|          | Assessor 1           | Assessor 2            | Assessor 3         | Assessor 4           | Total  |
| Item 1   | 5                    | 7                     | 5                  | 4                    | 21     |
| Item 2   | 5                    | 4                     | 5                  | 4                    | 18     |
| Item 3   | 5                    | 7                     | 7                  | 7                    | 26     |
| Total    | 15                   | 18                    | 17                 | 15                   | 65     |
| Domain 2 |                      |                       |                    | Domain scores        | 26.39% |
|          | Assessor 1           | Assessor 2            | Assessor 3         | Assessor 4           | Total  |
| Item 4   | 6                    | 6                     | 4                  | 6                    | 22     |
| Item 5   | 1                    | 1                     | 1                  | 1                    | 4      |
| Item 6   | 1                    | 1                     | 2                  | 1                    | 5      |
| Total    | 8                    | 8                     | 7                  | 8                    | 31     |
| Domain 3 |                      |                       |                    | Domain scores        | 39.58% |
|          | Assessor 1           | Assessor 2            | Assessor 3         | Assessor 4           | Total  |
| Item 7   | 1                    | 1                     | 1                  | 1                    | 4      |
| Item 8   | 1                    | 1                     | 1                  | 1                    | 4      |
| Item 9   | 4                    | 3                     | 7                  | 3                    | 17     |
| Item 10  | 2                    | 3                     | 3                  | 3                    | 11     |
| Item 11  | 6                    | 6                     | 5                  | 6                    | 23     |
| Item 12  | 6                    | 6                     | 5                  | 6                    | 23     |
| Item 13  | 4                    | 4                     | 4                  | 4                    | 16     |
| Item 14  | 2                    | 3                     | 2                  | 3                    | 10     |
| Total    | 26                   | 27                    | 28                 | 27                   | 108    |
| Domain 4 |                      |                       |                    | Domain scores        | 70.83% |
|          | Assessor 1           | Assessor 2            | Assessor 3         | Assessor 4           | Total  |
| Item 15  | 6                    | 5                     | 6                  | 5                    | 22     |
| Item 16  | 5                    | 4                     | 6                  | 4                    | 19     |
| Item 17  | 6                    | 5                     | 6                  | 5                    | 22     |
| Total    | 17                   | 14                    | 18                 | 14                   | 63     |
| Domain 5 |                      |                       |                    | Domain scores        | 35.42% |
|          | Assessor 1           | Assessor 2            | Assessor 3         | Assessor 4           | Total  |
| Item 18  | 1                    | 1                     | 1                  | 1                    | 4      |
| Item 19  | 6                    | 4                     | 5                  | 4                    | 19     |
| Item 20  | 1                    | 1                     | 1                  | 1                    | 4      |
| Item 21  | 6                    | 6                     | 5                  | 6                    | 23     |
| Total    | 14                   | 12                    | 12                 | 12                   | 50     |
| Domain 6 |                      |                       |                    | Domain scores        | 0.00%  |
|          | Assessor 1           | Assessor 2            | Assessor 3         | Assessor 4           | Total  |
| Item 22  | 1                    | 1                     | 1                  | 1                    | 4      |
| Item 23  | 1                    | 1                     | 1                  | 1                    | 4      |
| Total    | 2                    | 2                     | 2                  | 2                    | 8      |

| ISPN     | Assessor 1<br>Zhu BH | Assessor 2<br>Liang Y | Assessor 3<br>Mi L | Assessor 4<br>Duan F |        |
|----------|----------------------|-----------------------|--------------------|----------------------|--------|
| Domain 1 |                      |                       |                    | Domain scores        | 62.50% |
|          | Assessor 1           | Assessor 2            | Assessor 3         | Assessor 4           | Total  |
| Item 1   | 5                    | 7                     | 6                  | 6                    | 24     |
| Item 2   | 5                    | 7                     | 6                  | 4                    | 22     |
| Item 3   | 3                    | 2                     | 2                  | 4                    | 11     |
| Total    | 13                   | 16                    | 14                 | 14                   | 57     |
| Domain 2 |                      |                       |                    | Domain scores        | 40.28% |
|          | Assessor 1           | Assessor 2            | Assessor 3         | Assessor 4           | Total  |
| Item 4   | 5                    | 7                     | 3                  | 7                    | 22     |
| Item 5   | 1                    | 1                     | 2                  | 1                    | 5      |
| Item 6   | 3                    | 4                     | 4                  | 3                    | 14     |
| Total    | 9                    | 12                    | 9                  | 11                   | 41     |
| Domain 3 |                      |                       |                    | Domain scores        | 25.52% |
|          | Assessor 1           | Assessor 2            | Assessor 3         | Assessor 4           | Total  |
| Item 7   | 2                    | 1                     | 1                  | 1                    | 5      |
| Item 8   | 1                    | 1                     | 1                  | 1                    | 4      |
| Item 9   | 1                    | 3                     | 1                  | 3                    | 8      |
| Item 10  | 6                    | 7                     | 5                  | 7                    | 25     |
| Item 11  | 4                    | 3                     | 4                  | 3                    | 14     |
| Item 12  | 4                    | 4                     | 4                  | 4                    | 16     |
| Item 13  | 1                    | 1                     | 2                  | 1                    | 5      |
| Item 14  | 1                    | 1                     | 1                  | 1                    | 4      |
| Total    | 20                   | 21                    | 19                 | 21                   | 81     |
| Domain 4 |                      |                       |                    | Domain scores        | 63.89% |
|          | Assessor 1           | Assessor 2            | Assessor 3         | Assessor 4           | Total  |
| Item 15  | 5                    | 4                     | 6                  | 4                    | 19     |
| Item 16  | 5                    | 5                     | 6                  | 5                    | 21     |
| Item 17  | 5                    | 4                     | 5                  | 4                    | 18     |
| Total    | 15                   | 13                    | 17                 | 13                   | 58     |
| Domain 5 |                      |                       |                    | Domain scores        | 39.58% |
|          | Assessor 1           | Assessor 2            | Assessor 3         | Assessor 4           | Total  |
| Item 18  | 2                    | 3                     | 3                  | 3                    | 11     |
| Item 19  | 6                    | 4                     | 5                  | 5                    | 20     |
| Item 20  | 1                    | 1                     | 1                  | 1                    | 4      |
| Item 21  | 6                    | 6                     | 1                  | 6                    | 19     |
| Total    | 15                   | 14                    | 10                 | 15                   | 54     |
| Domain 6 |                      |                       |                    | Domain scores        | 0.00%  |
|          | Assessor 1           | Assessor 2            | Assessor 3         | Assessor 4           | Total  |
| Item 22  | 1                    | 1                     | 1                  | 1                    | 4      |
| Item 23  | 1                    | 1                     | 1                  | 1                    | 4      |
| Total    | 2                    | 2                     | 2                  | 2                    | 8      |

| NICE     | Assessor 1<br>Zhu BH | Assessor 2<br>Liang Y | Assessor 3<br>Mi L | Assessor 4<br>Duan F |        |
|----------|----------------------|-----------------------|--------------------|----------------------|--------|
| Domain 1 |                      |                       |                    | Domain scores        | 91.67% |
|          | Assessor 1           | Assessor 2            | Assessor 3         | Assessor 4           | Total  |
| Item 1   | 7                    | 7                     | 6                  | 7                    | 27     |
| Item 2   | 7                    | 6                     | 6                  | 6                    | 25     |
| Item 3   | 7                    | 7                     | 5                  | 7                    | 26     |
| Total    | 21                   | 20                    | 17                 | 20                   | 78     |
| Domain 2 |                      |                       |                    | Domain scores        | 41.67% |
|          | Assessor 1           | Assessor 2            | Assessor 3         | Assessor 4           | Total  |
| Item 4   | 1                    | 2                     | 1                  | 2                    | 6      |
| Item 5   | 1                    | 4                     | 3                  | 4                    | 12     |
| Item 6   | 7                    | 7                     | 3                  | 7                    | 24     |
| Total    | 9                    | 13                    | 7                  | 13                   | 42     |
| Domain 3 |                      |                       |                    | Domain scores        | 26.56% |
|          | Assessor 1           | Assessor 2            | Assessor 3         | Assessor 4           | Total  |
| Item 7   | 1                    | 1                     | 1                  | 1                    | 4      |
| Item 8   | 1                    | 1                     | 1                  | 1                    | 4      |
| Item 9   | 3                    | 3                     | 1                  | 3                    | 10     |
| Item 10  | 2                    | 1                     | 2                  | 1                    | 6      |
| Item 11  | 4                    | 5                     | 4                  | 5                    | 18     |
| Item 12  | 5                    | 4                     | 6                  | 4                    | 19     |
| Item 13  | 1                    | 1                     | 1                  | 1                    | 4      |
| Item 14  | 4                    | 4                     | 6                  | 4                    | 18     |
| Total    | 21                   | 20                    | 22                 | 20                   | 83     |
| Domain 4 |                      |                       |                    | Domain scores        | 72.22% |
|          | Assessor 1           | Assessor 2            | Assessor 3         | Assessor 4           | Total  |
| Item 15  | 7                    | 5                     | 6                  | 5                    | 23     |
| Item 16  | 4                    | 4                     | 6                  | 4                    | 18     |
| Item 17  | 7                    | 5                     | 6                  | 5                    | 23     |
| Total    | 18                   | 14                    | 18                 | 14                   | 64     |
| Domain 5 |                      |                       |                    | Domain scores        | 53.13% |
|          | Assessor 1           | Assessor 2            | Assessor 3         | Assessor 4           | Total  |
| Item 18  | 1                    | 1                     | 3                  | 1                    | 6      |
| Item 19  | 7                    | 6                     | 6                  | 6                    | 25     |
| Item 20  | 3                    | 5                     | 3                  | 5                    | 16     |
| Item 21  | 6                    | 5                     | 4                  | 5                    | 20     |
| Total    | 17                   | 17                    | 16                 | 17                   | 67     |
| Domain 6 |                      |                       |                    | Domain scores        | 0.00%  |
|          | Assessor 1           | Assessor 2            | Assessor 3         | Assessor 4           | Total  |
| Item 22  | 1                    | 1                     | 1                  | 1                    | 4      |
| Item 23  | 1                    | 1                     | 1                  | 1                    | 4      |
| Total    | 2                    | 2                     | 2                  | 2                    | 8      |

| Pyelonephritis guideline | Assessor 1<br>Zhu BH | Assessor 2<br>Liang Y | Assessor 3<br>Mi L | Assessor 4<br>Duan F |           |
|--------------------------|----------------------|-----------------------|--------------------|----------------------|-----------|
| Domain 1                 |                      |                       |                    | Domain scores        | 66.67%    |
|                          | Assessor 1           | Assessor 2            | Assessor 3         | Assessor 4           | Total     |
| Item 1                   | 6                    | 7                     | 6                  | 5                    | 24        |
| Item 2                   | 6                    | 6                     | 4                  | 4                    | 20        |
| Item 3                   | 5                    | 5                     | 2                  | 4                    | 16        |
| Total                    | 17                   | 18                    | 12                 | 13                   | <b>60</b> |
| Domain 2                 |                      |                       |                    | Domain scores        | 12.50%    |
|                          | Assessor 1           | Assessor 2            | Assessor 3         | Assessor 4           | Total     |
| Item 4                   | 2                    | 3                     | 3                  | 4                    | 12        |
| Item 5                   | 1                    | 1                     | 1                  | 1                    | 4         |
| Item 6                   | 1                    | 1                     | 2                  | 1                    | 5         |
| Total                    | 4                    | 5                     | 6                  | 6                    | <b>21</b> |
| Domain 3                 |                      |                       |                    | Domain scores        | 25.00%    |
|                          | Assessor 1           | Assessor 2            | Assessor 3         | Assessor 4           | Total     |
| Item 7                   | 1                    | 1                     | 1                  | 1                    | 4         |
| Item 8                   | 1                    | 1                     | 3                  | 1                    | 6         |
| Item 9                   | 4                    | 3                     | 3                  | 5                    | 15        |
| Item 10                  | 1                    | 1                     | 1                  | 1                    | 4         |
| Item 11                  | 4                    | 6                     | 5                  | 6                    | 21        |
| Item 12                  | 5                    | 6                     | 5                  | 6                    | 22        |
| Item 13                  | 1                    | 1                     | 1                  | 1                    | 4         |
| Item 14                  | 1                    | 1                     | 1                  | 1                    | 4         |
| Total                    | 18                   | 20                    | 20                 | 22                   | <b>80</b> |
| Domain 4                 |                      |                       |                    | Domain scores        | 75.00%    |
|                          | Assessor 1           | Assessor 2            | Assessor 3         | Assessor 4           | Total     |
| Item 15                  | 6                    | 6                     | 5                  | 6                    | 23        |
| Item 16                  | 5                    | 6                     | 5                  | 6                    | 22        |
| Item 17                  | 4                    | 5                     | 6                  | 6                    | 21        |
| Total                    | 15                   | 17                    | 16                 | 18                   | <b>66</b> |
| Domain 5                 |                      |                       |                    | Domain scores        | 29.17%    |
|                          | Assessor 1           | Assessor 2            | Assessor 3         | Assessor 4           | Total     |
| Item 18                  | 1                    | 1                     | 1                  | 1                    | 4         |
| Item 19                  | 4                    | 3                     | 3                  | 3                    | 13        |
| Item 20                  | 1                    | 1                     | 1                  | 1                    | 4         |
| Item 21                  | 6                    | 6                     | 5                  | 6                    | 23        |
| Total                    | 12                   | 11                    | 10                 | 11                   | <b>44</b> |
| Domain 6                 |                      |                       |                    | Domain scores        | 0.00%     |
|                          | Assessor 1           | Assessor 2            | Assessor 3         | Assessor 4           | Total     |
| Item 22                  | 1                    | 1                     | 1                  | 1                    | 4         |
| Item 23                  | 1                    | 1                     | 1                  | 1                    | 4         |
| Total                    | 2                    | 2                     | 2                  | 2                    | <b>8</b>  |

| CMA-CSP  | Assessor 1<br>Zhu BH | Assessor 2<br>Liang Y | Assessor 3<br>Mi L | Assessor 4<br>Duan F |        |
|----------|----------------------|-----------------------|--------------------|----------------------|--------|
| Domain 1 |                      |                       |                    | Domain scores        | 75.00% |
|          | Assessor 1           | Assessor 2            | Assessor 3         | Assessor 4           | Total  |
| Item 1   | 6                    | 7                     | 5                  | 7                    | 25     |
| Item 2   | 5                    | 5                     | 5                  | 5                    | 20     |
| Item 3   | 6                    | 6                     | 3                  | 6                    | 21     |
| Total    | 17                   | 18                    | 13                 | 18                   | 66     |
| Domain 2 |                      |                       |                    | Domain scores        | 59.72% |
|          | Assessor 1           | Assessor 2            | Assessor 3         | Assessor 4           | Total  |
| Item 4   | 6                    | 6                     | 5                  | 6                    | 23     |
| Item 5   | 1                    | 1                     | 1                  | 1                    | 4      |
| Item 6   | 7                    | 7                     | 7                  | 7                    | 28     |
| Total    | 14                   | 14                    | 13                 | 14                   | 55     |
| Domain 3 |                      |                       |                    | Domain scores        | 54.17% |
|          | Assessor 1           | Assessor 2            | Assessor 3         | Assessor 4           | Total  |
| Item 7   | 6                    | 6                     | 6                  | 6                    | 24     |
| Item 8   | 7                    | 6                     | 6                  | 6                    | 25     |
| Item 9   | 5                    | 6                     | 6                  | 6                    | 23     |
| Item 10  | 2                    | 5                     | 3                  | 5                    | 15     |
| Item 11  | 5                    | 4                     | 5                  | 4                    | 18     |
| Item 12  | 5                    | 5                     | 6                  | 5                    | 21     |
| Item 13  | 1                    | 1                     | 3                  | 1                    | 6      |
| Item 14  | 1                    | 1                     | 1                  | 1                    | 4      |
| Total    | 32                   | 34                    | 36                 | 34                   | 136    |
| Domain 4 |                      |                       |                    | Domain scores        | 68.06% |
|          | Assessor 1           | Assessor 2            | Assessor 3         | Assessor 4           | Total  |
| Item 15  | 5                    | 6                     | 6                  | 6                    | 23     |
| Item 16  | 6                    | 4                     | 6                  | 4                    | 20     |
| Item 17  | 5                    | 4                     | 5                  | 4                    | 18     |
| Total    | 16                   | 14                    | 17                 | 14                   | 61     |
| Domain 5 |                      |                       |                    | Domain scores        | 22.92% |
|          | Assessor 1           | Assessor 2            | Assessor 3         | Assessor 4           | Total  |
| Item 18  | 2                    | 1                     | 1                  | 1                    | 5      |
| Item 19  | 1                    | 1                     | 3                  | 1                    | 6      |
| Item 20  | 1                    | 1                     | 1                  | 1                    | 4      |
| Item 21  | 6                    | 6                     | 5                  | 6                    | 23     |
| Total    | 10                   | 9                     | 10                 | 9                    | 38     |
| Domain 6 |                      |                       |                    | Domain scores        | 97.92% |
|          | Assessor 1           | Assessor 2            | Assessor 3         | Assessor 4           | Total  |
| Item 22  | 7                    | 7                     | 6                  | 7                    | 27     |
| Item 23  | 7                    | 7                     | 7                  | 7                    | 28     |
| Total    | 14                   | 14                    | 13                 | 14                   | 55     |
